# Supplementary material
Source: PubMed Central journal article supplement (PMC4646405)
Supplement: supp_M115.652511_jbc.M115.652511-11.pdf [file supp_M115.652511_jbc.M115.652511-11.pdf]

## Calcium Signaling Throughout the *Toxoplasma gondii* Lytic Cycle. A Study Using Genetically Encoded Calcium Indicators.

Lucas Borges-Pereira, et al.

### Supporting Videos :

**Video S1 (Fig. 1A):** Egress of GCaMP3-expressing tachyzoites from *R-GECO*-expressing HeLa cells after addition of 1  $\mu\text{M}$  ionomycin. The buffer was Ringer buffer with 2 mM  $\text{Ca}^{2+}$ .

**Video S2 (Fig. 2A):** Lack of egress of *GCaMP3*-expressing tachyzoites from *R-GECO*-expressing HeLa cells upon addition of 1  $\mu\text{M}$  thapsigargin in the presence of extracellular  $\text{Ca}^{2+}$ .

**Video S3 (Fig. 3A):** Egress of *GCaMP3*-expressing tachyzoites from *R-GECO*-expressing HeLa cells after addition of 5 mM DTT. The buffer used was Ringer buffer with 2 mM  $\text{Ca}^{2+}$ .

**Video S4 (Fig. 4A):** Egress of *GCaMP3*-expressing tachyzoites from *R-GECO*-expressing HeLa cells after addition of 0.01% saponin. The buffer was Ringer buffer with 2 mM  $\text{Ca}^{2+}$ .

**Video S5A (Fig. 5C):** Changes in fluorescence of *GCaMP6f*-expressing parasites within HeLa cells in Intracellular Buffer in the presence of 1 mM  $\text{Ca}^{2+}$ . Saponin at 0.01% was added at time 10 s.

**Video S5B (Fig. 5D):** Changes in fluorescence of *GCaMP6f*-expressing parasites within HeLa cells in Intracellular Buffer (no  $\text{Ca}^{2+}$  added, final free  $\text{Ca}^{2+}$  concentration is 90 nM). Saponin at 0.01% was added at time 10 s.

**Video S6 (Fig. 7A-B):** Changes in  $\text{Ca}^{2+}$  levels in *B-GECO*-expressing HeLa cells (*blue*), parasitophorous vacuole (*red*, as detected by *R-GECO* targeted to the PV), and *GCaMP3*-expressing tachyzoites (*green*) after addition of histamine.

**Video S7 (Fig. 8):** *GCaMP6*-expressing tachyzoites were allowed to invade in the presence of 2 mM  $\text{Ca}^{2+}$ . An increase in fluorescence indicates an increase in cytosolic  $\text{Ca}^{2+}$  followed by stimulation of motility and invasion.

**Video S8a (Fig. 9A):** *GCaMP6f*-expressing tachyzoites showing stimulation of gliding after adding  $\text{Ca}^{2+}$ . Notice that parasites drift and oscillate but after addition of  $\text{Ca}^{2+}$  to the buffer, fluorescence increases, parasites halt, attach and start gliding

**Video S8b (Fig. 9B):** *GCaMP6f*-expressing tachyzoites showing stimulation of motility after addition of thapsigargin and  $\text{Ca}^{2+}$ .
